# Supplementary material
Source: PubMed Central journal article supplement (PMC6498150)
Supplement: AEM.00139-19-s0001.pdf [file AEM.00139-19-s0001.pdf]

**Supporting Information for**

**Comparative Genomic Analyses of Municipal Wastewater *Salmonella* Isolates Detects a Clinically  
Unreported Salmonellosis Outbreak**

Sabrina Diemert and Tao Yan\*

\* Corresponding author (taoyan@hawaii.edu)

Department of Civil and Environmental Engineering, University of Hawaii at Manoa, Honolulu, HI

96822

- Number of pages: 4 (S1-S4)
- Number of tables: 5 (Tables S1-S5; Tables S3-S5 provided as Microsoft Excel spreadsheets)
- Number of figures: 1 (S1)

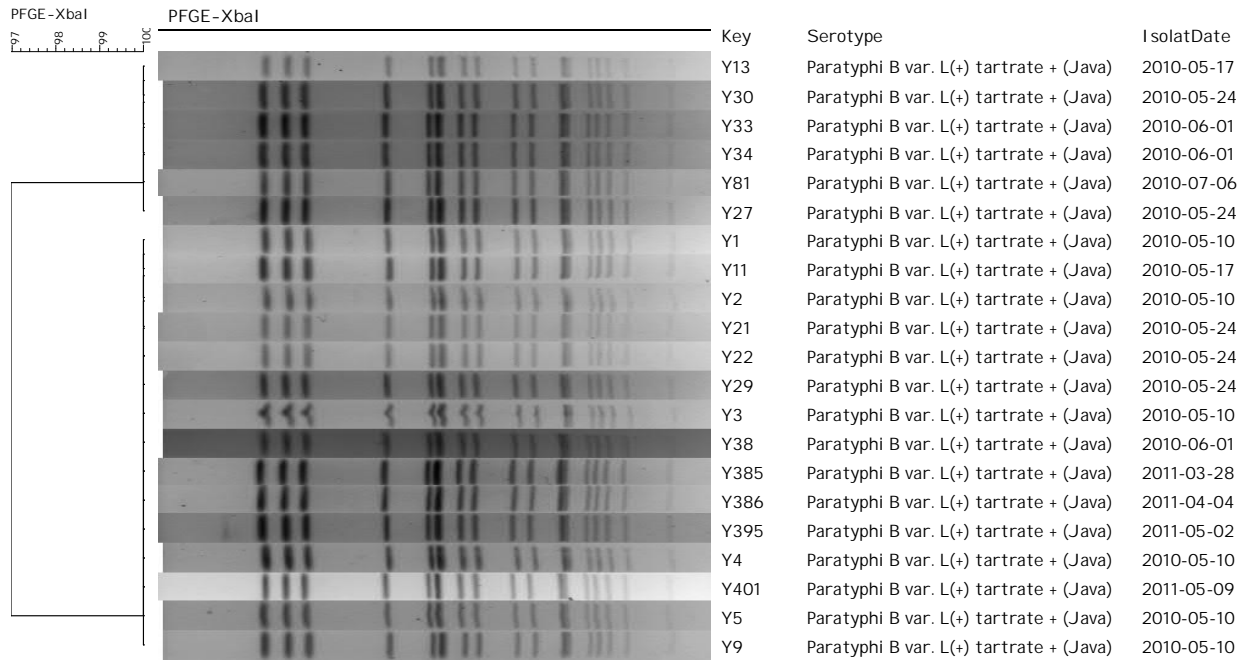

Figure S1: PFGE dendrogram for *Salmonella enterica* serovar Paratyphi B var. Java (Paratyphi B var. L(+) tartrate (+), aka *S. Java*) isolates from Hawaii municipal wastewater (MW).

Differences in clusters are likely ascribed to annotation of a single band as singlet vs. doublet in BioNumerics. Note that samples are named beginning with “Y”, instead of “HIY” elsewhere in publication. Clinical isolates from the 2010 outbreak sharing the same PFGE pattern were assigned the PFGE XbaI pattern JKXX01.0194 via PulseNet (Pamela O’Brien, personal communication, November 2018).

Table S1: SPAdes genome assembly data for *S. Java* isolates from Hawaii municipal wastewater (MW)

| Isolate name <sup>a</sup> | Biosample accession number <sup>b</sup> | SRA run number (for WGS data) <sup>c</sup> | Genome assembly coverage <sup>d</sup> | Number of contigs | Number of contigs >500 bp | Genome size (Mb) | Longest contig | N50 <sup>e</sup> | L50 <sup>e</sup> |
|---------------------------|-----------------------------------------|--------------------------------------------|---------------------------------------|-------------------|---------------------------|------------------|----------------|------------------|------------------|
| HIY0001_2010-05-10        | SAMN10496253                            | SRR5238264                                 | 109.8                                 | 62                | 50                        | 4.69             | 378196         | 221551           | 8                |
| HIY0002_2010-05-10        | SAMN10496250                            | SRR5238166                                 | 80.6                                  | 62                | 52                        | 4.69             | 604759         | 312296           | 6                |
| HIY0003_2010-05-10        | SAMN10496252                            | SRR5238249                                 | 137.2                                 | 64                | 37                        | 4.70             | 630300         | 334985           | 6                |
| HIY0004_2010-05-10        | SAMN10496251                            | SRR5238235                                 | 111.6                                 | 75                | 64                        | 4.69             | 397537         | 172158           | 9                |
| HIY0005_2010-05-10        | SAMN10496249                            | SRR5238148                                 | 83.8                                  | 65                | 56                        | 4.69             | 414658         | 229518           | 7                |
| HIY0009_2010-05-10        | SAMN10496242                            | SRR3294513                                 | 53.8                                  | 72                | 57                        | 4.69             | 393271         | 203825           | 8                |
| HIY0011_2010-05-17        | SAMN10496240                            | SRR3182472                                 | 73.5                                  | 54                | 43                        | 4.69             | 397537         | 232688           | 8                |
| HIY0013_2010-05-17        | SAMN10496254                            | SRR5318398                                 | 61.8                                  | 51                | 37                        | 4.69             | 687767         | 321416           | 6                |
| HIY0021_2010-05-24        | SAMN10496255                            | SRR5318402                                 | 31.8                                  | 47                | 38                        | 4.69             | 630263         | 321416           | 6                |
| HIY0022_2010-05-24        | SAMN10496256                            | SRR5366629                                 | 90.5                                  | 53                | 42                        | 4.69             | 630300         | 321416           | 6                |
| HIY0027_2010-05-24        | SAMN10496260                            | SRR5470976                                 | 78.7                                  | 68                | 53                        | 4.70             | 604651         | 231012           | 7                |
| HIY0029_2010-05-24        | SAMN10496259                            | SRR5470973                                 | 73.4                                  | 61                | 47                        | 4.70             | 630263         | 334985           | 6                |
| HIY0030_2010-05-24        | SAMN10496241                            | SRR3182490                                 | 232.0                                 | 54                | 31                        | 4.70             | 687804         | 397250           | 5                |
| HIY0033_2010-06-01        | SAMN10496257                            | SRR5470970                                 | 49.7                                  | 52                | 41                        | 4.69             | 630262         | 334985           | 6                |
| HIY0034_2010-06-01        | SAMN10496258                            | SRR5470972                                 | 73.1                                  | 63                | 45                        | 4.70             | 630300         | 334985           | 6                |
| HIY0038_2010-06-01        | SAMN10496245                            | SRR3457661                                 | 67.9                                  | 53                | 42                        | 4.69             | 630416         | 321416           | 6                |
| HIY0081_2010-07-06        | SAMN10496247                            | SRR3457664                                 | 76.7                                  | 52                | 43                        | 4.69             | 630532         | 334985           | 6                |
| HIY0385_2011-03-28        | SAMN10496246                            | SRR3457662                                 | 51.5                                  | 43                | 36                        | 4.69             | 630300         | 334985           | 6                |
| HIY0386_2011-04-04        | SAMN10496248                            | SRR3457665                                 | 48.6                                  | 47                | 39                        | 4.69             | 630300         | 334985           | 6                |
| HIY0395_2011-05-02        | SAMN10496243                            | SRR3457658                                 | 54.8                                  | 48                | 39                        | 4.69             | 687805         | 334985           | 6                |
| HIY0401_2011-05-09        | SAMN10496244                            | SRR3457660                                 | 46.6                                  | 47                | 38                        | 4.69             | 630263         | 321416           | 6                |

**Notes:**

- a. Isolate name is composed of (Sample ID)\_(Isolation date).
- b. BioSamples for assemblies are uploaded to NCBI under BioProject PRJNA507471.
- c. WGS data are uploaded to NCBI SRA under BioProject PRJNA274995. This is linked with BioProject PRJNA507471 under umbrella BioProject PRJNA508196.
- d. Assembly coverage assessed using BMap of trimmed SRA paired-end reads against assembled contigs.
- e. N50 and L50 assessed using QUAST(1); parameters reported only consider contigs  $\geq$  500 bp.

Table S2: Additional clinical S. Java isolate data (available from BioProject PRJNA230403)

| Sample name            | Strain                                  | Isolate type | BioSample    | SRA accession number | Run number | Isolation date | Additional metadata                        | Submitter                                     |
|------------------------|-----------------------------------------|--------------|--------------|----------------------|------------|----------------|--------------------------------------------|-----------------------------------------------|
| SRR7639130-USA-Unknown | 2010K-0885                              | clinical     | SAMN09761643 | SRX4502673           | SRR7639130 | Unknown        | Data missing                               | EDLB-CDC (Enteric Diseases Laboratory Branch) |
| SRR7639138-USA-Unknown | 2010K-0883                              | clinical     | SAMN09761656 | SRX4502681           | SRR7639138 | Unknown        | Data missing                               | EDLB-CDC (Enteric Diseases Laboratory Branch) |
| SRR3205681-USA-2010-05 | Paratyphi B var. L(+) tartrate + (Java) | clinical     | SAMN04485993 | SRX1614841           | SRR3205681 | 2010-05        | Stool sample, host age 30-39, HHS region 9 | CDC-PulseNet                                  |

All samples from Table S2 were obtained from exploration of the NCBI Pathogen Detection (Beta) Isolates Browser (2); the Browser provides access to data from the NCBI Pathogen Detection Pipeline: whole genome sequencing (WGS) data from the FDA, CDC, USDA, and other organizations is collected, clustered via maximum compatibility (3), and screened for the presence of antimicrobial resistance genes. These isolates were chosen from the same SNP cluster as the MW isolates (SNP cluster accession = PDS000027748.8).

## References

1. Gurevich A, Saveliev V, Vyahhi N, Tesler G. 2013. QUAST: Quality assessment tool for genome assemblies. *Bioinformatics* 29:1072–1075.
2. NCBI. 2018. Pathogen Detection (Beta) Isolates Browser. <https://www.ncbi.nlm.nih.gov/pathogens>, retrieved June 28, 2018.
3. Cherry JL. 2017. A practical exact maximum compatibility algorithm for reconstruction of recent evolutionary history. *BMC Bioinformatics* 18:1–12.
